# Supplementary material
Source: publisher figshare collection journal article supplement (https://diabetesjournals.figshare.com/ndownloader/files/22454594)
Supplement: Supplementary file 1 [file 22454594]

# Calculating Medication Adherence

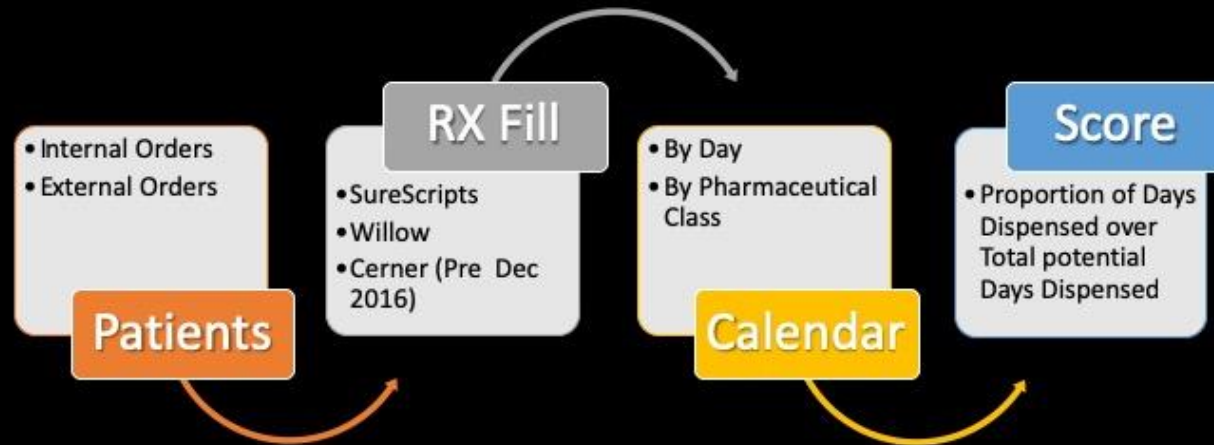

Patient: Bob N.

|             | 1/1/2017 | 1/2/2017 | 1/3/2017 | 1/4/2017 | 1/5/2017 | 1/6/2017 | 1/7/2017 | 1/8/2017 | 1/9/2017 | 1/10/2017 |
|-------------|----------|----------|----------|----------|----------|----------|----------|----------|----------|-----------|
| Metformin   | 1        | 1        | 1        | 1        | 1        | 1        | 1        | 0        | 0        | 1         |
| Saxagliptin | NA       | NA       | 1        | 1        | 1        | 1        | 1        | 1        | 1        | 1         |

  

|                  |            |                    |             |
|------------------|------------|--------------------|-------------|
| <b>Metformin</b> | <b>80%</b> | <b>Saxagliptin</b> | <b>100%</b> |
|------------------|------------|--------------------|-------------|

Figure S1: Process and workflows for calculating medication adherence using a Proportion of Days Covered approach

**P-SAM (Parkland Score for Adherence to Medication)**

| THERAPEUTIC CLASS             | PHARMACY CLASS                                     | ADHERENCE RATE | DAYS ADHERENT | FROM DATE  | TO DATE    | CALCULATED DATE |
|-------------------------------|----------------------------------------------------|----------------|---------------|------------|------------|-----------------|
| ACEI/ARB/ARBNI/RI             | Example Med: Lisinopril, Losartan                  | 26.30          | 96            | 06/03/2018 | 06/02/2019 | 06/02/2019      |
| Anticonvulsant - GABA Analogs | Example Med: Gabapentin, Pregabalin                | 9.86           | 36            | 06/03/2018 | 06/02/2019 | 06/02/2019      |
| ANTIHYPERGLYCEMICS            | INSULINS                                           | 100.00         | 365           | 06/03/2018 | 06/02/2019 | 06/02/2019      |
| Biguanides                    | Example Med: Metformin                             | 21.36          | 78            | 06/03/2018 | 06/02/2019 | 06/02/2019      |
| CCB                           | CALCIUM CHANNEL BLOCKING AGENTS                    | 100.00         | 1             | 04/02/2019 | 04/02/2019 | 06/02/2019      |
| PSYCHOTHERAPEUTIC DRUGS       | ANTI-ANXIETY DRUGS                                 | 10.08          | 36            | 06/03/2018 | 05/25/2019 | 06/02/2019      |
| PSYCHOTHERAPEUTIC DRUGS       | SEROTONIN-2 ANTAGONIST/REUPTAKE INHIBITORS (SARIS) | 73.33          | 66            | 03/05/2019 | 06/02/2019 | 06/02/2019      |
| SSRI/SSRI Combo               | Example: Citalopram, Fluoxetine                    | 51.82          | 185           | 06/03/2018 | 05/25/2019 | 06/02/2019      |
| Statin/Statin Combo           | Example Med: Atorvastatin                          | 4.93           | 18            | 06/03/2018 | 06/02/2019 | 06/02/2019      |

Figure S2: Parkland Score for Adherence to Medications (P-SAM) display in the electronic medical record

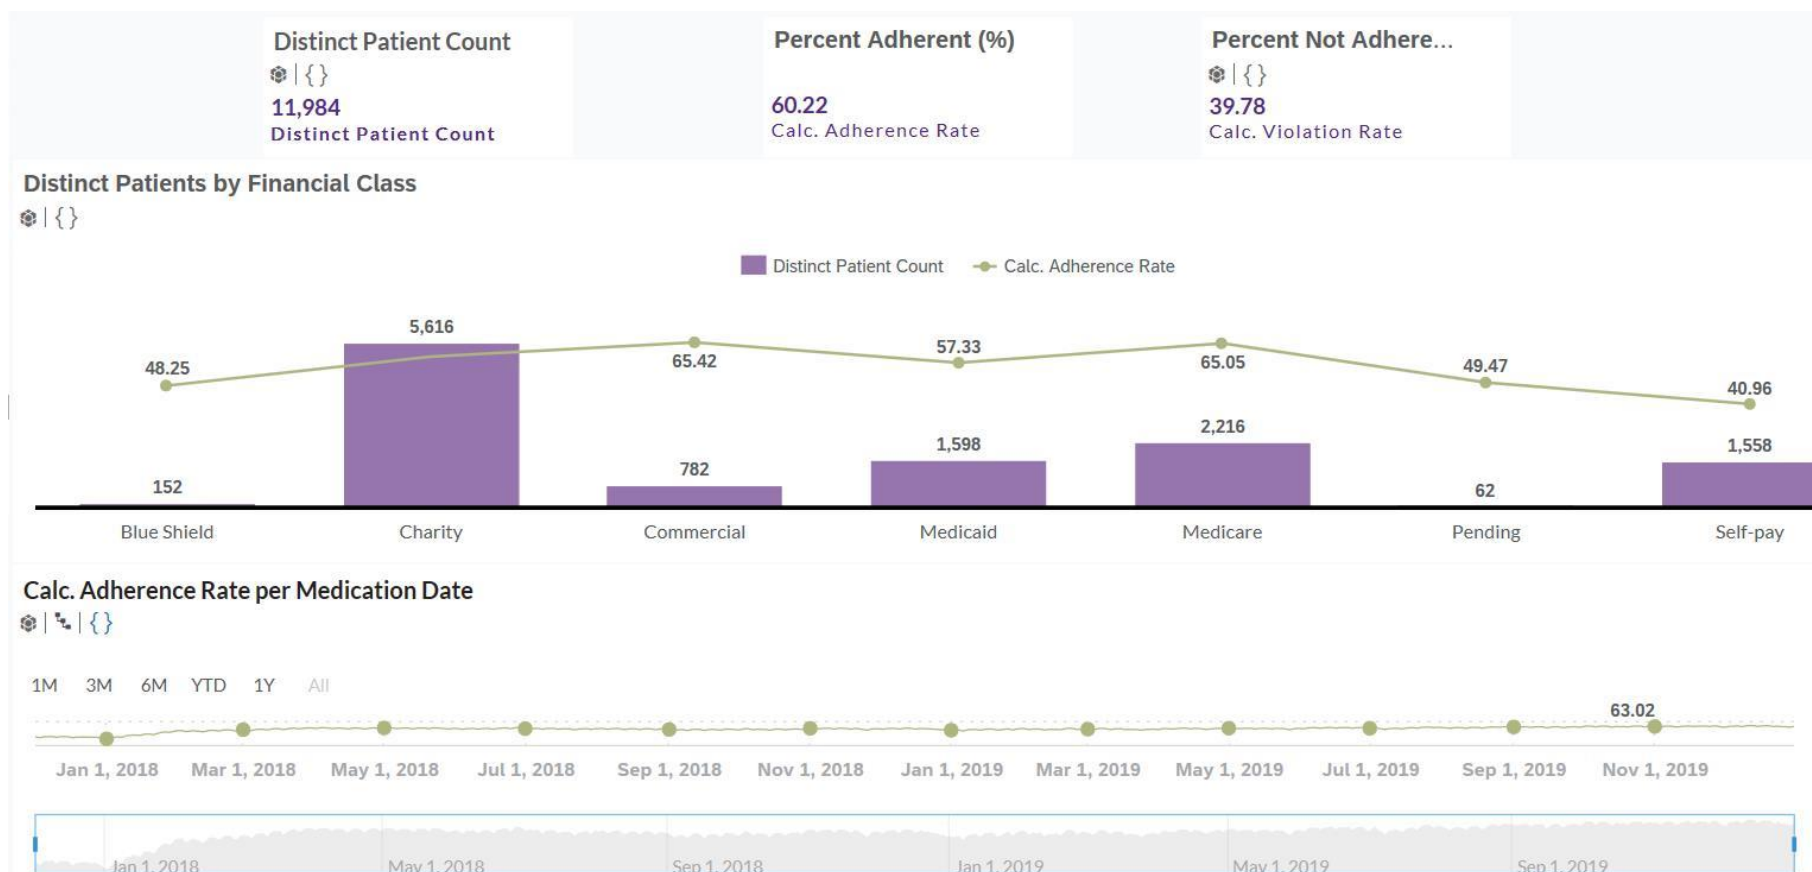

Figure S3: Example of biguanide medication adherence dashboard for population health management

**Table S1. Diabetes drug classes included in adherence model**

SGLT-2 & DPP-4 INHIBITOR COMB.

DPP-4 ENZYME INHIB & THIAZOLIDINEDIONE

DPP-4 INHIBITOR & BIGUANIDE COMB

INCRETIN MIMETICS (GLP-1 RECEPTOR AGONIST)

DPP-4 INHIBITORS & HMG COA REDUCTASE (STATINS)

AMYLIN ANALOG-TYPE

DPP-4 INHIBITORS

SGLT2 INHIBITOR & BIGUANIDE COMB

SODIUM/GLUCOCOTRANSPORTER2 (SGLT2) INHIB

DOPAMINE RECEPTOR AGONISTS

ALPHA-GLUCOSIDASE INHIBITORS

INSULIN-RELEASING STIMULANT & BIGUANIDE COMB

INSULIN-RELEASE STIMULANT TYPE

THIAZOLIDINEDIONE & BIGUANIDE

THIAZOLIDINEDIONE & SULFONYLUREA

THIAZOLIDINEDIONE (PPARG AGONIST)

BIGUANIDE & DIETARY SUPPLEMENT COMB

INSULINS\*

\* Disclosure that information is based on days' supply of insulin dispensed in the original prescription and does not take into account adjustments in insulin dosing that may have occurred since then (unless they are reflected in a follow-on insulin prescription reflecting the updated dosing).

| <b>Table S2. Example correlation of A1c to liraglutide adherence based on fill history (internal data)</b> |                                   |                                                     |
|------------------------------------------------------------------------------------------------------------|-----------------------------------|-----------------------------------------------------|
| Liraglutide Adherence                                                                                      | <b>Total Population (n = 188)</b> | <b>HbA1c within 90 Days of First Fill (n = 104)</b> |
|                                                                                                            | HbA1c, mg/dL                      | HbA1c, mg/dL                                        |
| Adherence Rate <40%                                                                                        | 9.15                              | 9.51                                                |
| Adherence Rate 40-80%                                                                                      | 8.52                              | 8.27                                                |
| Adherence Rate >80%                                                                                        | 8.16                              | 7.64                                                |
